# Supplementary material for: A Versatile Protocol for Efficient Transformation and Regeneration in Mega Indica Rice Cultivar MTU1010: Optimization through Hormonal Variables
Source: MDPI journal article supplement (doi:10.3390/mps6060113), 2023-11-23
Supplement: s1 [file s1]

**Table S1: Concentration of various plant growth regulators and antibiotics used.**

| Growth Regulators/ Antibiotics               | Abbreviations  | Solvents         | Stock concentration | Working concentration |
|----------------------------------------------|----------------|------------------|---------------------|-----------------------|
| N <sup>6</sup> -Benzyl amino purine          | BAP            | 1N NaOH          | 1 mg/ml             | 2.5 mg/L              |
| 6-Furfuryl amino purine (Kinetin)            | Kn             | 1N NaOH          | 1 mg/ml             | 1 mg/L                |
| alpha- Naphthalene acetic acid               | NAA            | Absolute alcohol | 1 mg/ml             | 0.5 mg/L              |
| 2,4-Dichlorophenoxyacetic acid               | 2,4-D          | Absolute alcohol | ---                 | 2.5 mg/L              |
| CEFOTAXIME SODIUM                            | Cefotaxime     | Water            | 250 mg/ml           | 300 mg/L              |
| TICARCILLIN DISODIUM / CLAVULANATE POTASSIUM | Timentin       | Water            | 200 mg/ml           | 200 mg/L              |
| 3/5-Dimethoxy-4-Hydroxyacetophenone          | Acetosyringone | DMSO             | Freshly prepared    | 150 µM                |
| Kanamycin                                    | Kanamycin      | Water            | 50 mg/ml            | 50 mg/l               |
| Rifampicin                                   | Rifampicin     | Methanol         | 12.5 mg/ml          | 12.5 mg/l             |

**Table S2: Effect of supplement of hormones 2,4-D and 6-BAP on embryogenic calli induction in CIM media of MTU1010 mega rice variety.**

| Hormones Concentration              | Replicates | No. of seeds inoculated | No. of seeds produced callus | Total no of embryogenic calli generated | Embryogenic callus induction (%) |
|-------------------------------------|------------|-------------------------|------------------------------|-----------------------------------------|----------------------------------|
| CIM + (2.5 mg/L 2,4-D)              | R1         | 100                     | 79                           | 73                                      | 73                               |
|                                     | R2         | 120                     | 91                           | 86                                      | 71.6                             |
|                                     | R3         | 140                     | 140                          | 91                                      | 65.1                             |
| CIM+ (2.5mg/L 2,4-D + 0.25mg/L BAP) | R1         | 100                     | 94                           | 92                                      | 92                               |
|                                     | R2         | 120                     | 118                          | 111                                     | 92.5                             |
|                                     | R3         | 125                     | 125                          | 112                                     | 89.6                             |

Embryogenic calli generation (%) = no. of embryogenic calli regenerated/no. of calli incubated × 100.

**Table S3:** Data represents the regeneration and transformation efficiency in different resuspension medium. Data shown are mean of three individual experiments.

| Resuspension medium | Pre-incubated agrobacterium culture+acetosyringone | No. of calli used for transformation | No. of plantlet regenerated | Total number of Hyg <sup>R</sup> plantlets | Regeneration frequency<br>(a)<br>(%) | Transformation efficiency<br>(b)<br>(%) |
|---------------------|----------------------------------------------------|--------------------------------------|-----------------------------|--------------------------------------------|--------------------------------------|-----------------------------------------|
| Full MS             | 0 min                                              | 250                                  | 21 ± 2.27                   | 15 ± 1.69                                  | 7.9 ± 0.89                           | 6.4 ± 0.67                              |
|                     | 10 min                                             | 185                                  | 15 ± 0.72                   | 14 ± 0.54                                  | 9.1 ± 0.38                           | 7.5 ± 0.29                              |
|                     | 30 min                                             | 200                                  | 35 ± 1.18                   | 31 ± 1.18                                  | 17.5 ± 0.29                          | 15.5 ± 0.59                             |
| 1/2 MS              | 0 min                                              | 230                                  | 84 ± 1.78                   | 74 ± 1.65                                  | 36.8 ± 0.77                          | 32.5 ± 0.71                             |
|                     | 10 min                                             | 200                                  | 86 ± 1.51                   | 76 ± 1.44                                  | 43 ± 0.75                            | 38.3 ± 0.72                             |
|                     | 30 min                                             | 220                                  | 99 ± 2.27                   | 91 ± 1.44                                  | 46.3 ± 0.96                          | 41.9 ± 0.65                             |
| 1/4 MS              | 0 min                                              | 250                                  | 91 ± 1.24                   | 85 ± 1.88                                  | 36.9 ± 0.84                          | 33.2 ± 0.85                             |
|                     | 10 min                                             | 220                                  | 101 ± 0.98                  | 92 ± 1.88                                  | 46.1 ± 0.81                          | 40 ± 1.03                               |
|                     | 30 min                                             | 200                                  | 101 ± 1.18                  | 88 ± 0.78                                  | 50.7 ± 0.59                          | 44.3 ± 0.30                             |

(a) Regeneration frequency% = (Number of plantlets regenerated/Number of microcalli incubated) × 100

(b) Transformation efficiency% = (Number of hygromycin resistant plants/Number of calli co-cultivated with Agrobacterium) × 100

**Table S4: Optimization of different hormones of the regeneration medium and its effects on regeneration frequency %.**

| Regeneration medium                         |                       | Replicates | No. of calli used for transformation | No. of plantlet regenerated | Regeneration frequency (%) |
|---------------------------------------------|-----------------------|------------|--------------------------------------|-----------------------------|----------------------------|
| 3 mg/L BAP+ 0.5mg/L NAA                     | Non-transformed calli | R1         | 150                                  | 120                         | 80                         |
|                                             |                       | R2         | 120                                  | 99                          | 82.5                       |
|                                             |                       | R3         | 115                                  | 90                          | 78.26                      |
| 2.5 mg/L BAP+ 1mg/L Kinetin + 0.5 mg/ L NAA |                       | R1         | 100                                  | 89                          | 89                         |
|                                             |                       | R2         | 120                                  | 111                         | 92.5                       |
|                                             |                       | R3         | 140                                  | 128                         | 91.4                       |
| 3 mg/L BAP+ 0.5mg/L NAA                     | Transformed calli     | R1         | 110                                  | 33                          | 30                         |
|                                             |                       | R2         | 108                                  | 24                          | 22.2                       |
|                                             |                       | R3         | 145                                  | 43                          | 29.6                       |
| 2.5 mg/L BAP+ 1mg/L Kinetin + 0.5 mg/ L NAA |                       | R1         | 125                                  | 52                          | 41.6                       |
|                                             |                       | R2         | 100                                  | 41                          | 41                         |
|                                             |                       | R3         | 150                                  | 64                          | 42.6                       |
